# Supplementary material for: Metatranscriptomic Approach to Analyze the Functional Human Gut Microbiota
Source: PLoS One. 2011 Mar 8;6(3):e17447. doi: 10.1371/journal.pone.0017447 (PMC3050895; doi:10.1371/journal.pone.0017447)
Supplement: Methods S1 — This file contains supplementary analysis. (DOC) [file pone.0017447.s001.doc]

**Methods SI**

**Statistical analysis**

We used a Bayesian hierarchical model to analyze potential associations between bacterial families and functional groups.Let Yij be the number of sequences from family j=1,…,m in functional group i=1,…,n. Let Eij be the number of expected sequences in function i and taxon j according to the standard null hypothesis of independence between functions and taxa. This hypothesis is equivalent to say that all families are present in a similar proportion in all the functions. Our model tries to detect departures from this null hypothesis. The specification is as follows. We first assume that Yij ~ Poisson(ij Eij), that is, we assume that the number of observed counts will follow a Poisson distribution with mean the expected counts (under independence) Eij times a factor ij that measures the over- or under-representation. Values of ij above 1 would indicate an over-representation of taxa j in function i. Conversely, values below 1 would suggest under-representation. We then assume that log(ij)=+i+j+ij. That is, the variation of the ij is then decomposed (on the log scale) into an overall intercept  plus function- and taxa-specific main effects i and j, respectively, plus an interaction ij. These interactions are to pick up departures from the null hypothesis of independence between functions and taxa.

In the Bayesian framework, all the model parameters are assigned prior distributions that represent prior belief or information, if available. This prior information is then combined with the information provided by the data (through the likelihood) via Bayes theorem to produce the posterior distribution of the model parameters, which is the output of the Bayesian inference. In complex models, the posterior distribution often does not have an analytically closed expression and one needs to resort to the so-called Markov chain Monte Carlo (MCMC) simulation techniques to obtain a sample from the posterior distribution for each model parameter. This posterior sample in later on summarized to extract the relevant information, point estimates, quantiles, credibility intervals, etc. We chose a flat normal prior distribution (i.e. a normal distribution with large variance) for the intercept. For the taxa and function main effects we chose i ~ Normal (0, ) and j ~ Normal(0, ), respectively. For the interactions ij, we chose a so-called “spike and slab” prior distribution ij ~ pNormal (0, 1) + (1-p) Normal (0, 2), which is a mixture of two zero-mean normal distributions, one with a large standard deviation (say 1) and the other with a small one. The latter is to pick up noise basically, whereas the former is to detect sizeable associations between taxa and functions. We also assigned the following prior distributions to the standard deviations of the random effects: ,  ~ InverseGamma(0.01, 0.01); 1 ~ Normal(0, 100) to allow for the standard deviation 1 to be potentially large, and 2 ~ Normal(0, 0.3) to ensure that it is small. The model was fitted using the license-free statistical package for Bayesian inference JAGS (http://www-fis.iarc.fr/~martyn/software/jags/).The statistical analyses were carried out with the free statistical package R (R Development Core Team 2009) and its libraries “vegan” (Oksanen et al. 2008) and “rjags” (Plummer 2009)".

**References**

Oksanen J, Kindt R, Legendre P, O'Hara B, Simpson GL, Solymos P, Stevens MHH, Wagner H. 2008. Vegan: Community ecology package. R package version 1.15-1. http://cran.r-project.org/, http://vegan.r-forge.r-project.org/.

Plummer M. 2009. rjags: Bayesian graphical models using MCMC. R package version 1.0.3-11. http://CRAN.R-project.org/package=rjags.

R Development Core Team. 2009. R: A language and environment for statistical computing. R Foundation for statistical computing, Vienna, Austria. ISBN 3-900051-07-0, URL http://www.R-project.org.
